# Supplementary material for: Large variation in the Rubisco kinetics of diatoms reveals diversity among their carbon-concentrating mechanisms
Source: PubMed Central journal article supplement (PMC4892730; doi:10.1093/jxb/erw163), 2016-04-29
Supplement: supp_erw163_supplementary_table_S1.pdf [file supp_erw163_supplementary_table_S1.pdf]

## Large variation in the Rubisco kinetics of diatoms reveals diversity among their carbon concentrating mechanisms.

YN Jodi, AMC Heurreux, RE Sharwood, REM Rickaby, FMM Morel, and S Whitney

**Supplementary Table S1** Rubisco kinetics at 25 °C taken from other datasets and used in Figure 2

|                                                             | $k_{cat}^c$<br>( $s^{-1}$ ) | $K_C$<br>( $\mu M$ ) | $K_O$<br>( $\mu M$ ) | Sc/o<br>( $mol \cdot mol^{-1}$ ) | calc $k_{cat}^o$<br>( $s^{-1}$ ) | Dataset<br>reference        |
|-------------------------------------------------------------|-----------------------------|----------------------|----------------------|----------------------------------|----------------------------------|-----------------------------|
| <b>Red Algae</b>                                            |                             |                      |                      |                                  |                                  |                             |
| <i>Griffithsia monilis</i>                                  | 2.6                         | 9                    | 467                  | 167                              | 0.78                             | Savir <i>et al.</i> (2010)  |
| <i>Galdiera sulfuraria</i>                                  | 1.2                         | 3                    | 374                  | 166                              | 0.82                             | Savir <i>et al.</i> (2010)  |
| <i>Porphyridium cruentum</i>                                | 1.6                         | 22                   | 1574                 | 129                              | 0.89                             | Badger <i>et al.</i> (1998) |
| <i>Cyanidium caldarium</i>                                  | 1.3                         | 7                    | n.d.                 | 224                              | n.d.                             | Badger <i>et al.</i> (1998) |
| <i>Cyanidium partita</i>                                    | 1.6                         | 7                    | n.d.                 | 238                              | n.d.                             | Badger <i>et al.</i> (1998) |
| <b>Green algae</b>                                          |                             |                      |                      |                                  |                                  |                             |
| <i>Scenedesmus obliquus</i>                                 | n.d.                        | 38                   | 660                  | 63                               | n.d.                             | Savir <i>et al.</i> (2010)  |
| <i>Chlamydomonas reinhardtii</i>                            | 5.8                         | 29                   | 480                  | 61                               | 1.57                             | Savir <i>et al.</i> (2010)  |
| <i>Euglena gracilis</i>                                     | n.d.                        | 25                   | 410                  | 54                               | n.d.                             | Savir <i>et al.</i> (2010)  |
| <b>Bryophytes</b>                                           |                             |                      |                      |                                  |                                  | Galmes <i>et al.</i> (2014) |
| <i>Atrichum undulatum</i>                                   | 3.0                         | 19                   | 806                  | n.d.                             | n.d.                             | Galmes <i>et al.</i> (2014) |
| <i>Marchantia polymorpha</i>                                | 2.6                         | 13                   | 565                  | n.d.                             | n.d.                             | Galmes <i>et al.</i> (2014) |
| <b>Ferns</b>                                                |                             |                      |                      |                                  |                                  |                             |
| <i>Pteridium aquilinum</i>                                  | 4.0                         | 14                   | 391                  | n.d.                             | n.d.                             | Galmes <i>et al.</i> (2014) |
| <i>Platycerium superbum</i>                                 | 2.3                         | 12                   | 459                  | n.d.                             | n.d.                             | Galmes <i>et al.</i> (2014) |
| <b>Gymnosperms</b>                                          |                             |                      |                      |                                  |                                  |                             |
| <i>Cycas panzhihuaensis</i>                                 | 3.1                         | 9                    | 525                  | n.d.                             | n.d.                             | Galmes <i>et al.</i> (2014) |
| <i>Metasequoia glyptostroboides</i>                         | 2.7                         | 16                   | 561                  | n.d.                             | n.d.                             | Galmes <i>et al.</i> (2014) |
| <i>Basal angiosperm</i>                                     |                             |                      |                      |                                  |                                  |                             |
| <i>Nymphaea alba</i>                                        | 2.4                         | 11                   | 438                  | n.d.                             | n.d.                             | Galmes <i>et al.</i> (2014) |
| <b>Aquatic macrophyte using HCO<sub>3</sub><sup>-</sup></b> |                             |                      |                      |                                  |                                  | Galmes <i>et al.</i> (2014) |
| <i>Ceratophyllum demersum</i>                               | 3.5                         | 14                   | 317                  | n.d.                             | n.d.                             | Galmes <i>et al.</i> (2014) |
| <b>CAM plants</b>                                           |                             |                      |                      |                                  |                                  |                             |
| <i>Agave victoriae-reginae</i>                              | 3.4                         | 10                   | 400                  | n.d.                             | n.d.                             | Galmes <i>et al.</i> (2014) |
| <i>Carpobrotus edulis</i>                                   | 3.6                         | 10                   | 313                  | n.d.                             | n.d.                             | Galmes <i>et al.</i> (2014) |
| <i>Echeveria elegans</i>                                    | 4.5                         | 11                   | 236                  | n.d.                             | n.d.                             | Galmes <i>et al.</i> (2014) |
| <b>Carnivorous plants</b>                                   |                             |                      |                      |                                  |                                  |                             |
| <i>Drosera capensis</i>                                     | 4.7                         | 10                   | 327                  | n.d.                             | n.d.                             | Galmes <i>et al.</i> (2014) |
| <i>Drosera venusta</i>                                      | 3.3                         | 12                   | 348                  | n.d.                             | n.d.                             | Galmes <i>et al.</i> (2014) |
| <i>Sarracenia flava</i>                                     | 4.4                         | 13                   | 426                  | n.d.                             | n.d.                             | Galmes <i>et al.</i> (2014) |
| <b>C<sub>3</sub></b>                                        |                             |                      |                      |                                  |                                  |                             |
| <i>Arabidopsis thaliana</i>                                 | 4.1                         | 10                   | 333                  | n.d.                             | n.d.                             | Galmes <i>et al.</i> (2014) |
| <i>Chenopodium alba</i>                                     | 2.9                         | 11                   | 415                  | 79                               | 1.37                             | Savir <i>et al.</i> (2010)  |
| <i>Crithmum maritimum</i>                                   | 3.4                         | 9                    | 183                  | n.d.                             | n.d.                             | Galmes <i>et al.</i> (2014) |
| <i>Dactylis glomerata cv. Porto</i>                         | 3.2                         | 11                   | 453                  | n.d.                             | n.d.                             | Galmes <i>et al.</i> (2014) |
| <i>Eucalyptus moorei</i>                                    | 3.2                         | 10                   | 285                  | n.d.                             | n.d.                             | Galmes <i>et al.</i> (2014) |
| <i>Eucalyptus neglecta</i>                                  | 2.5                         | 8                    | 230                  | n.d.                             | n.d.                             | Galmes <i>et al.</i> (2014) |
| <i>Flaveria pringlei</i>                                    | 3.1                         | 12                   | 666                  | 81                               | 2.12                             | Savir <i>et al.</i> (2010)  |
| <i>Glycine max</i>                                          | n.d.                        | 9                    | 430                  | 82                               | n.d.                             | Savir <i>et al.</i> (2010)  |
| <i>Iris douglasiana</i>                                     | 3.5                         | 10                   | 413                  | n.d.                             | n.d.                             | Galmes <i>et al.</i> (2014) |
| <i>Limonium latebracteatum</i>                              | 2.7                         | 9                    | 344                  | n.d.                             | n.d.                             | Galmes <i>et al.</i> (2014) |
| <i>Limonium stenophyllum</i>                                | 2.6                         | 8                    | 457                  | n.d.                             | n.d.                             | Galmes <i>et al.</i> (2014) |
| <i>Limonium virgatum</i>                                    | 2.4                         | 9                    | 381                  | n.d.                             | n.d.                             | Galmes <i>et al.</i> (2014) |
| <i>lolium perenne</i>                                       | n.d.                        | 16                   | 500                  | 80                               | n.d.                             | Galmes <i>et al.</i> (2014) |
| <i>Nicotiana tabacum</i>                                    | 3.4                         | 11                   | 295                  | 82                               | 1.14                             | Galmes <i>et al.</i> (2014) |
| <i>Nicotiana tabacum (this)</i>                             | 3.1                         | 10                   | 283                  | 83                               | 1.09                             | this study                  |
| <i>Pallenis maritima</i>                                    | 2.7                         | 6                    | 321                  | n.d.                             | n.d.                             | Galmes <i>et al.</i> (2014) |
| <i>Sideritis cretica subsp. spicata</i>                     | 2.0                         | 8                    | 328                  | n.d.                             | n.d.                             | Galmes <i>et al.</i> (2014) |
| <i>Spnacia oleracea</i>                                     | 3.7                         | 14                   | 480                  | 80                               | 1.59                             | Savir <i>et al.</i> (2010)  |
| <i>Tetragonium expnasa</i>                                  | n.d.                        | 13                   | 600                  | 81                               | n.d.                             | Savir <i>et al.</i> (2010)  |
| <i>Teucrium heterophyllum</i>                               | 2.7                         | 7                    | 359                  | n.d.                             | n.d.                             | Galmes <i>et al.</i> (2014) |

|                                                |     |      |      |      |      |                                                          |
|------------------------------------------------|-----|------|------|------|------|----------------------------------------------------------|
| <i>Trachycarpus fortunei</i>                   | 2.8 | 9    | 364  | n.d. | n.d. | Galmes <i>et al.</i> (2014)                              |
| <i>Triticum aestivum</i>                       | 2.5 | 14   | 730  | 90   | 1.45 | Savir <i>et al.</i> (2010)                               |
| <i>Triticum aestivum</i> cv. <i>Alexandria</i> | 4.0 | 10   | 414  | n.d. | n.d. | Galmes <i>et al.</i> (2014)                              |
| <b>C<sub>4</sub></b>                           |     |      |      |      |      |                                                          |
| <i>Amaranthus edulis</i>                       | 4.1 | 18   | 289  | 77   | 0.85 | Whitney <i>et al.</i> (2011), Savir <i>et al.</i> (2010) |
| <i>Amaranthus hybridus</i>                     | 3.8 | 16   | 640  | 82   | 1.85 | Whitney <i>et al.</i> (2011), Savir <i>et al.</i> (2010) |
| <i>Cynodon dactylon</i>                        | 3.7 | 21   | n.d. | 89   | n.d. | Whitney <i>et al.</i> (2011)                             |
| <i>Flaveria australasica</i>                   | 3.8 | 22   | 309  | 77   | 0.69 | Whitney <i>et al.</i> (2011), Savir <i>et al.</i> (2010) |
| <i>Flaveria bidentis</i>                       | 4.2 | 20.2 | n.d. | 76   | n.d. | Whitney <i>et al.</i> (2011)                             |
| <i>Flaveria kochiana</i>                       | 3.7 | 22.7 | n.d. | 77   | n.d. | Whitney <i>et al.</i> (2011)                             |
| <i>Flaveria trinervia</i>                      | 4.4 | 17.9 | n.d. | 77   | n.d. | Whitney <i>et al.</i> (2011)                             |
| <i>Paspalum dilatatum</i>                      | 3.4 | 19.9 | n.d. | 88   | n.d. | Whitney <i>et al.</i> (2011)                             |
| <i>Potuloca oleraca</i>                        | 5.9 | 14   | n.d. | 78   | n.d. | Savir <i>et al.</i> (2010)                               |
| <i>Sorghum bicolor</i>                         | 5.4 | 30   | n.d. | 70   | n.d. | Whitney <i>et al.</i> (2011)                             |
| <i>Sorghum bicoor</i>                          | 5.4 | 30   | n.d. | 70   | n.d. | Savir <i>et al.</i> (2010)                               |
| <i>Zea mays</i>                                | 4.4 | 34   | 810  | 78   | 1.34 | Savir <i>et al.</i> (2010)                               |
| <i>Zea mays</i> (this study)                   | 5.5 | 19   | 397  | 88   | 1.31 | this study                                               |
| <i>Zoysia japonica</i>                         | 4.1 | 18.5 | n.d. | 84   | n.d. | Whitney <i>et al.</i> (2011)                             |

\* also used in the analysis of Figure 1

## References

- Badger MRT, Andrews J, Whitney SM, Ludwig M, Yellowlees DC, Leggat W, Price GD.** (1998) The diversity and coevolution of Rubisco, plastids, pyrenoids, and chloroplast-based CO<sub>2</sub>-concentrating mechanisms in algae. *Canadian Journal of Botany* 76: 1052-1071
- Galmes J, Kapralov MV, Andralojc PJ, Conesa MÀ, Keys AJ, Parry MAJ, Flexas J.** (2014) Expanding knowledge of the Rubisco kinetics variability in plant species: environmental and evolutionary trends. *Plant, Cell & Environment* 37: 1989-2001
- Savir Y, Noor E, Milo R, Tlustý T.** (2010) Cross-species analysis traces adaptation of Rubisco toward optimality in a low-dimensional landscape. *Proceedings of the National Academy of Sciences* 107: 3475-3480
- Whitney SM, Houtz RL, Alonso H.** (2011) Advancing Our Understanding and Capacity to Engineer Nature's CO<sub>2</sub>-Sequestering Enzyme, Rubisco. *Plant Physiology* 155: 27-35
